# Supplementary material
Source: Atypon-hosted journal article supplement (doi:10.1287/opre.2023.0513)

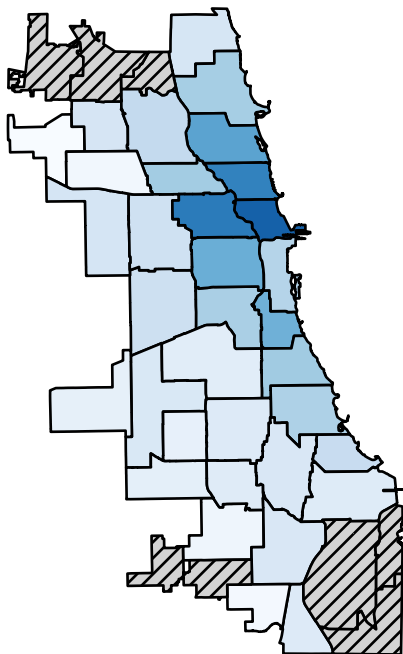

Supplement: opre.2023.0513.cd.zip [file fig10 - Cost efficiency - iterative - c=0.9 sojourn_time=180.pdf › 2023.0513/results/figures/fig10 - Cost efficiency - iterative - c=0.9 sojourn_time=180.pdf]

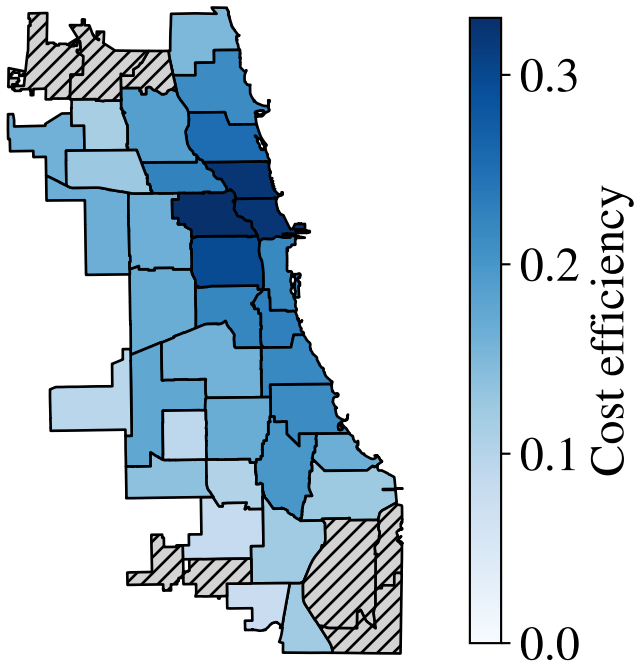

Supplement: opre.2023.0513.cd.zip [file fig10 - Cost efficiency - match - c=0.9 sojourn_time=180.pdf › 2023.0513/results/figures/fig10 - Cost efficiency - match - c=0.9 sojourn_time=180.pdf]

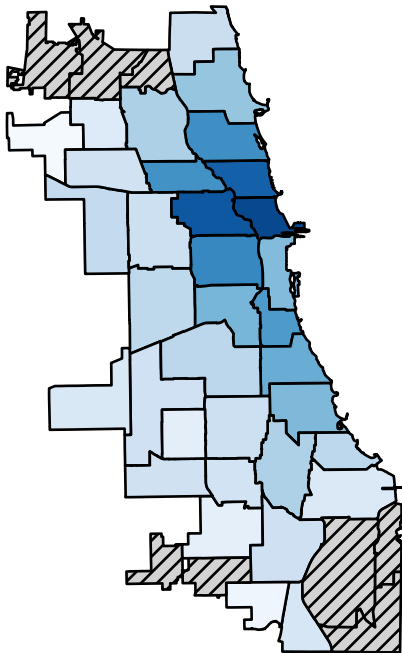

Supplement: opre.2023.0513.cd.zip [file fig10 - Cost efficiency - static - c=0.9 sojourn_time=180.pdf › 2023.0513/results/figures/fig10 - Cost efficiency - static - c=0.9 sojourn_time=180.pdf]

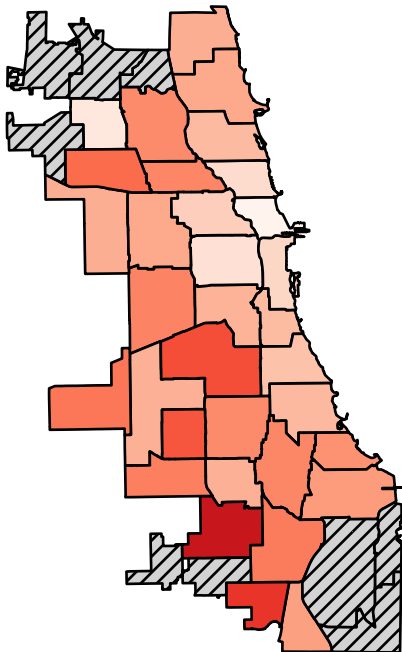

Supplement: opre.2023.0513.cd.zip [file fig10 - Detour rate - iterative - c=0.9 sojourn_time=180.pdf › 2023.0513/results/figures/fig10 - Detour rate - iterative - c=0.9 sojourn_time=180.pdf]

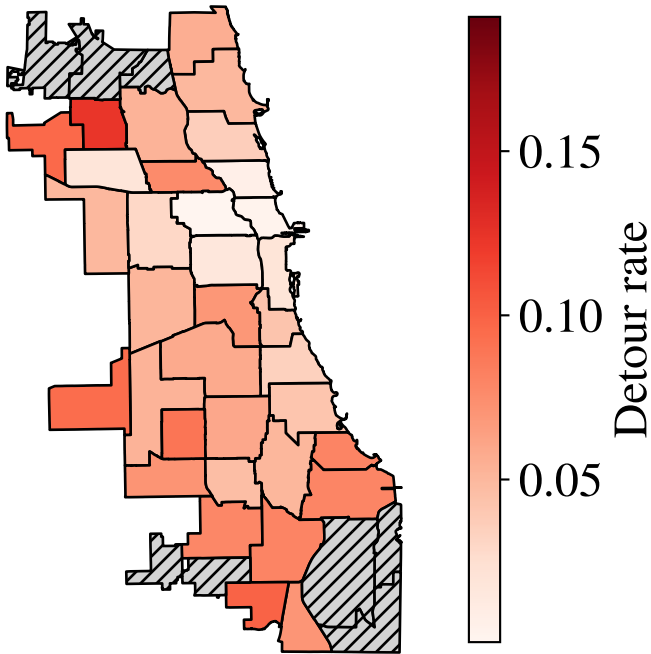

Supplement: opre.2023.0513.cd.zip [file fig10 - Detour rate - match - c=0.9 sojourn_time=180.pdf › 2023.0513/results/figures/fig10 - Detour rate - match - c=0.9 sojourn_time=180.pdf]

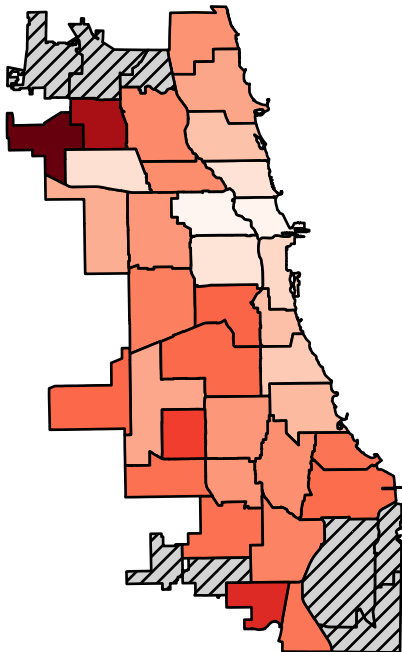

Supplement: opre.2023.0513.cd.zip [file fig10 - Detour rate - static - c=0.9 sojourn_time=180.pdf › 2023.0513/results/figures/fig10 - Detour rate - static - c=0.9 sojourn_time=180.pdf]

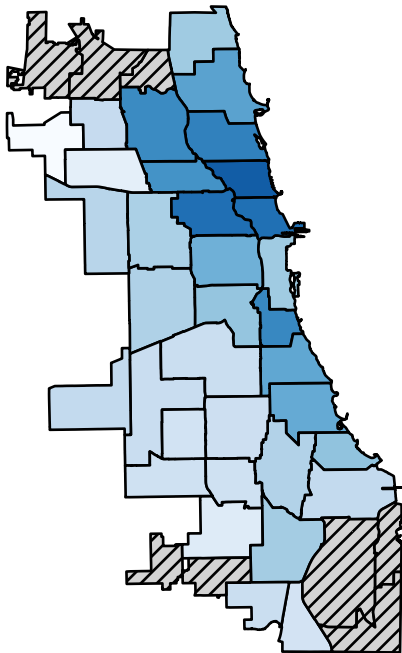

Supplement: opre.2023.0513.cd.zip [file fig10 - Match rate - iterative - c=0.9 sojourn_time=180.pdf › 2023.0513/results/figures/fig10 - Match rate - iterative - c=0.9 sojourn_time=180.pdf]

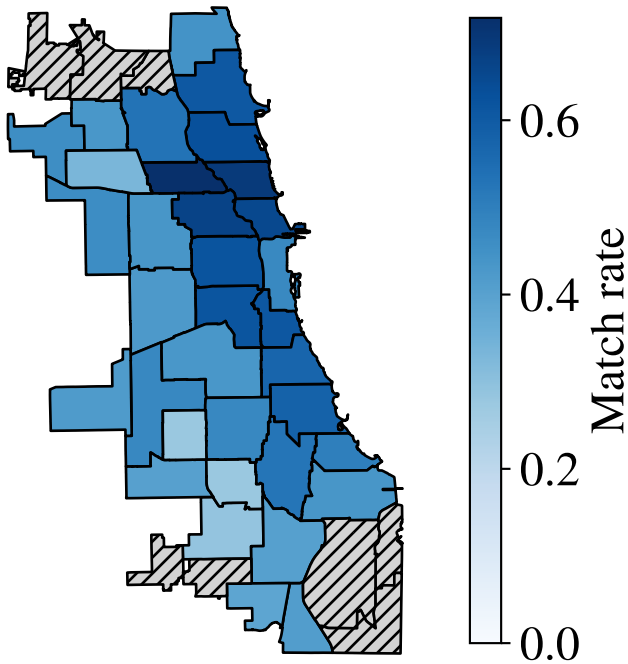

Supplement: opre.2023.0513.cd.zip [file fig10 - Match rate - match - c=0.9 sojourn_time=180.pdf › 2023.0513/results/figures/fig10 - Match rate - match - c=0.9 sojourn_time=180.pdf]

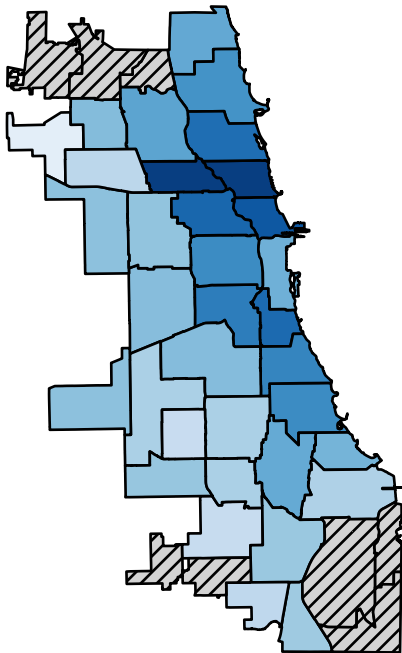

Supplement: opre.2023.0513.cd.zip [file fig10 - Match rate - static - c=0.9 sojourn_time=180.pdf › 2023.0513/results/figures/fig10 - Match rate - static - c=0.9 sojourn_time=180.pdf]

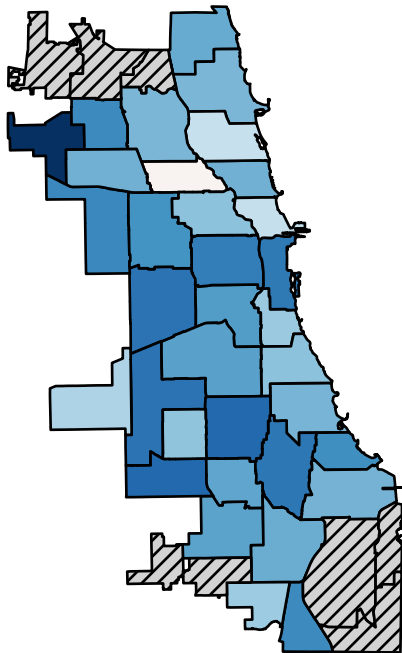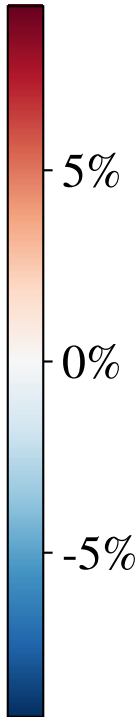

Difference in Payment

Supplement: opre.2023.0513.cd.zip [file fig11 - Difference - Payment - c=0.9 sojourn_time=180.pdf › 2023.0513/results/figures/fig11 - Difference - Payment - c=0.9 sojourn_time=180.pdf]

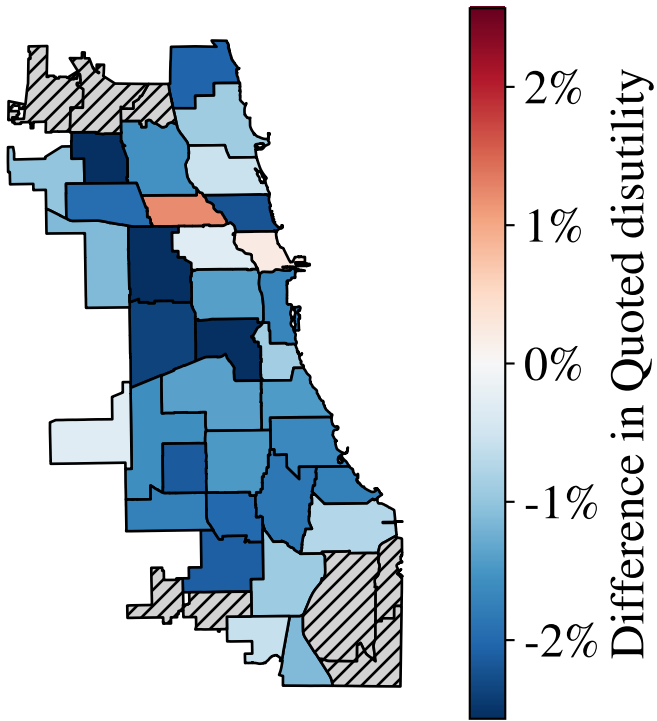

Supplement: opre.2023.0513.cd.zip [file fig11 - Difference - Quoted disutility - c=0.9 sojourn_time=180.pdf › 2023.0513/results/figures/fig11 - Difference - Quoted disutility - c=0.9 sojourn_time=180.pdf]

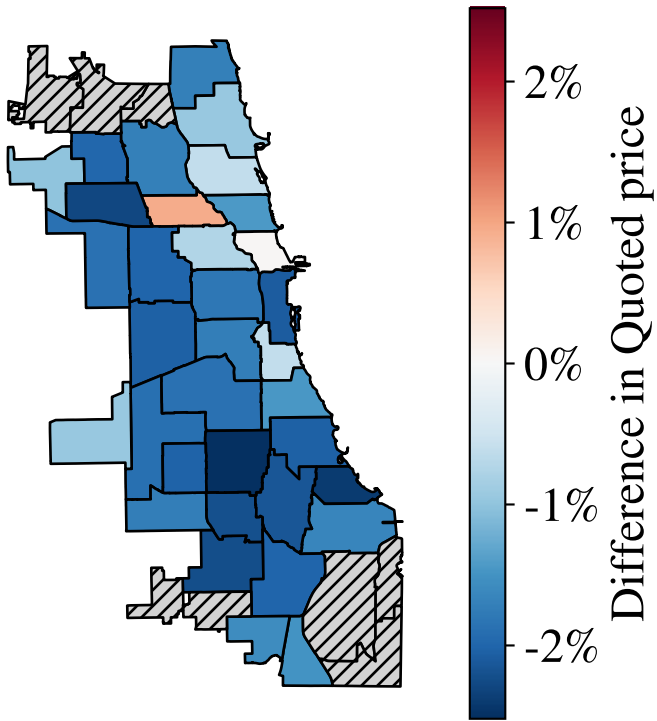

Supplement: opre.2023.0513.cd.zip [file fig11 - Difference - Quoted price - c=0.9 sojourn_time=180.pdf › 2023.0513/results/figures/fig11 - Difference - Quoted price - c=0.9 sojourn_time=180.pdf]

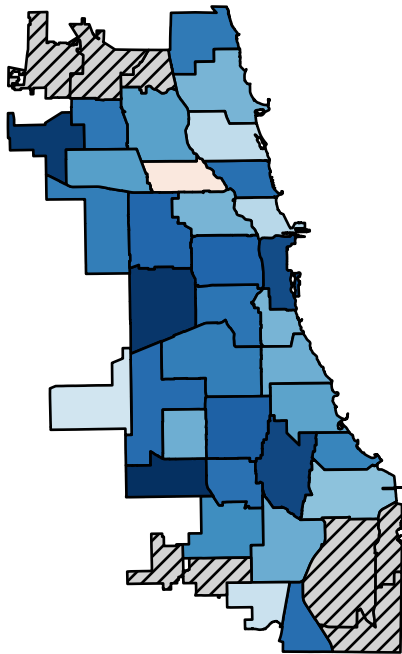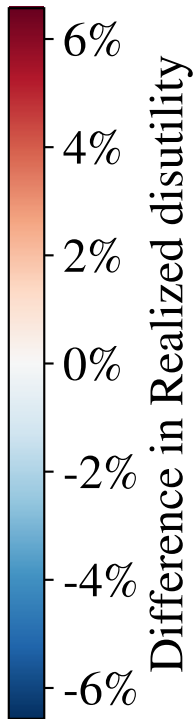

Supplement: opre.2023.0513.cd.zip [file fig11 - Difference - Realized disutility - c=0.9 sojourn_time=180.pdf › 2023.0513/results/figures/fig11 - Difference - Realized disutility - c=0.9 sojourn_time=180.pdf]

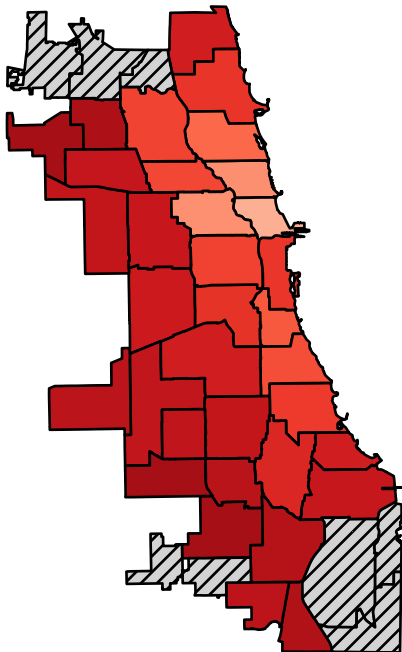

Supplement: opre.2023.0513.cd.zip [file fig9 - Payment - iterative - c=0.9 sojourn_time=180.pdf › 2023.0513/results/figures/fig9 - Payment - iterative - c=0.9 sojourn_time=180.pdf]

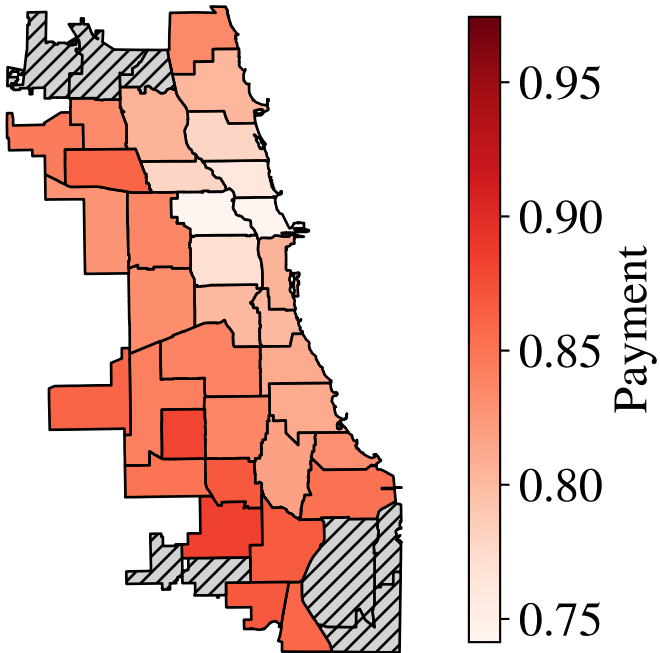

Supplement: opre.2023.0513.cd.zip [file fig9 - Payment - match - c=0.9 sojourn_time=180.pdf › 2023.0513/results/figures/fig9 - Payment - match - c=0.9 sojourn_time=180.pdf]

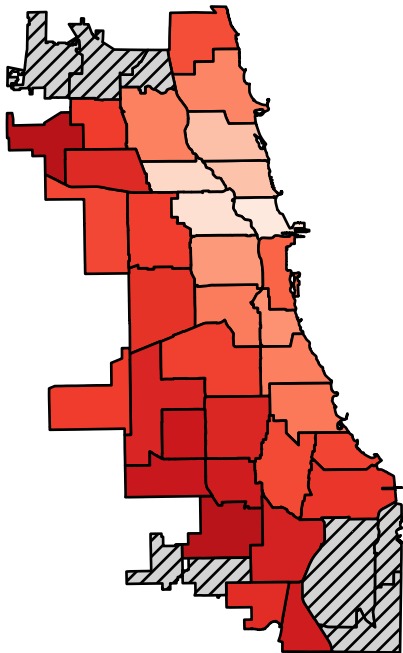

Supplement: opre.2023.0513.cd.zip [file fig9 - Payment - static - c=0.9 sojourn_time=180.pdf › 2023.0513/results/figures/fig9 - Payment - static - c=0.9 sojourn_time=180.pdf]

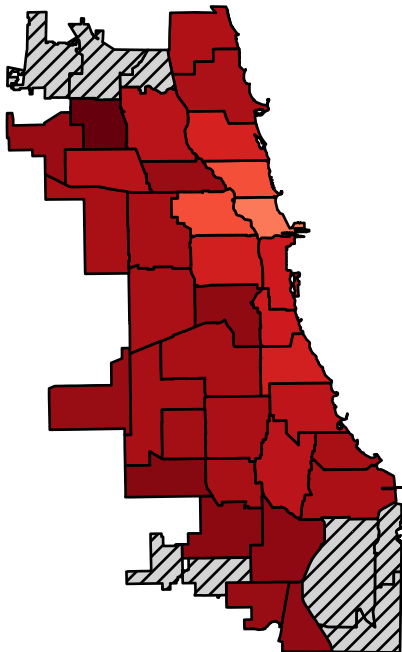

Supplement: opre.2023.0513.cd.zip [file fig9 - Quoted disutility - iterative - c=0.9 sojourn_time=180.pdf › 2023.0513/results/figures/fig9 - Quoted disutility - iterative - c=0.9 sojourn_time=180.pdf]

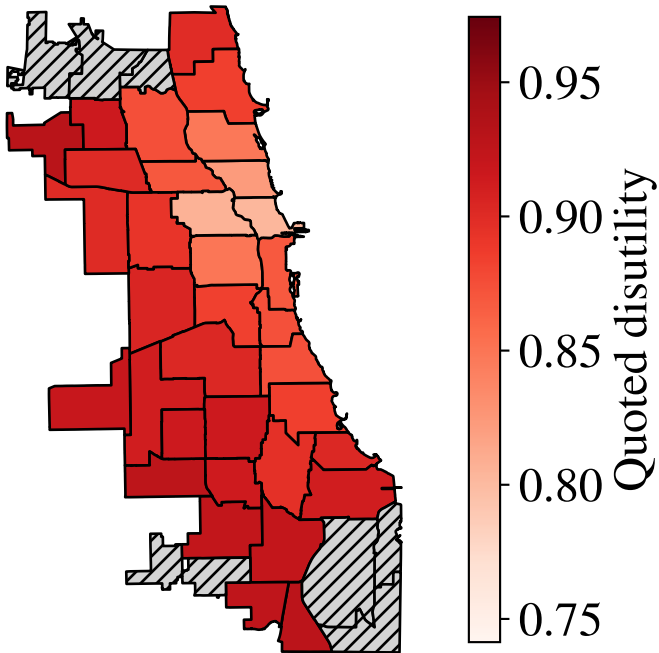

Supplement: opre.2023.0513.cd.zip [file fig9 - Quoted disutility - match - c=0.9 sojourn_time=180.pdf › 2023.0513/results/figures/fig9 - Quoted disutility - match - c=0.9 sojourn_time=180.pdf]

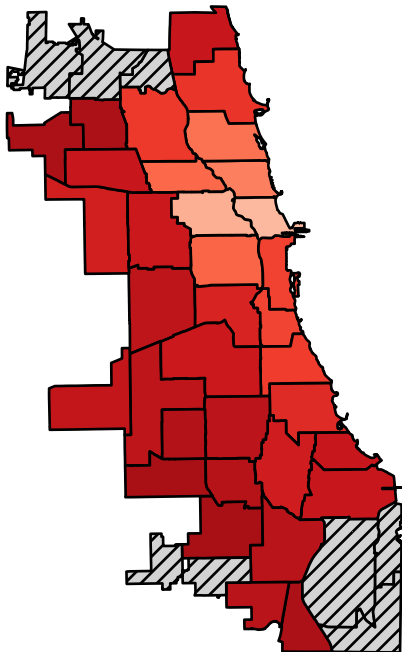

Supplement: opre.2023.0513.cd.zip [file fig9 - Quoted disutility - static - c=0.9 sojourn_time=180.pdf › 2023.0513/results/figures/fig9 - Quoted disutility - static - c=0.9 sojourn_time=180.pdf]

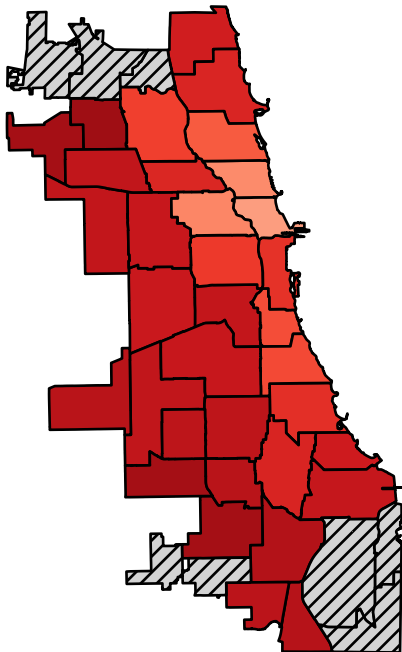

Supplement: opre.2023.0513.cd.zip [file fig9 - Quoted price - iterative - c=0.9 sojourn_time=180.pdf › 2023.0513/results/figures/fig9 - Quoted price - iterative - c=0.9 sojourn_time=180.pdf]

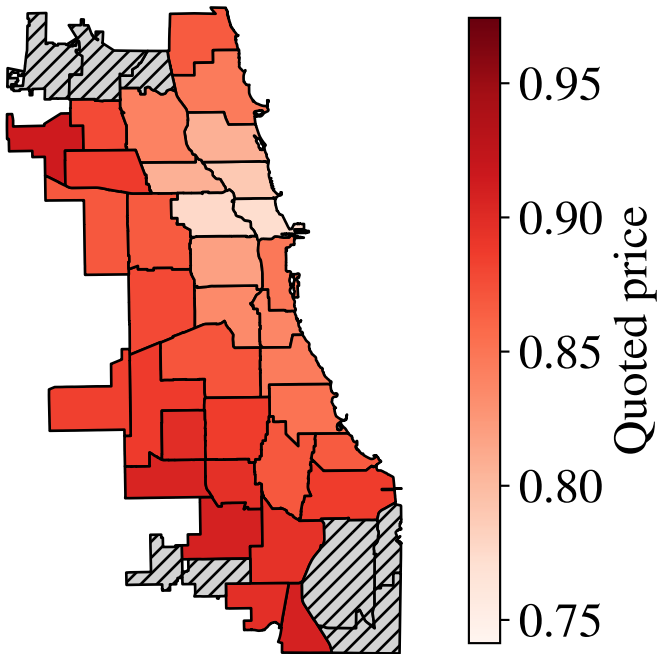

Supplement: opre.2023.0513.cd.zip [file fig9 - Quoted price - match - c=0.9 sojourn_time=180.pdf › 2023.0513/results/figures/fig9 - Quoted price - match - c=0.9 sojourn_time=180.pdf]

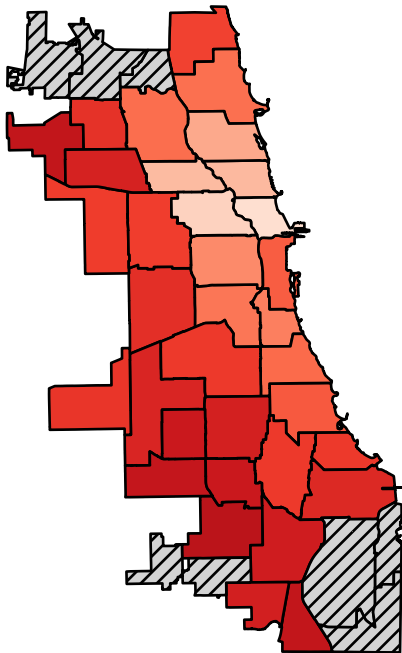

Supplement: opre.2023.0513.cd.zip [file fig9 - Quoted price - static - c=0.9 sojourn_time=180.pdf › 2023.0513/results/figures/fig9 - Quoted price - static - c=0.9 sojourn_time=180.pdf]

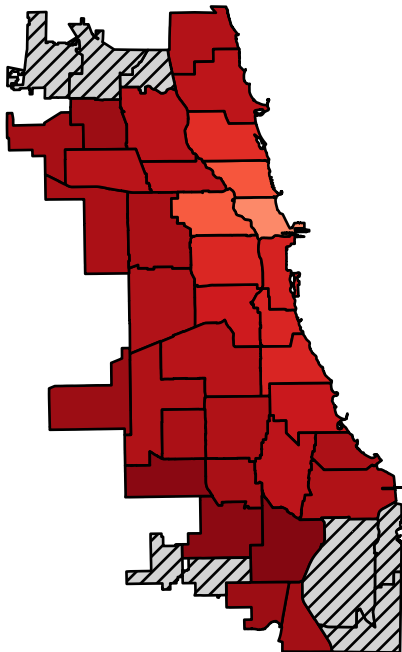

Supplement: opre.2023.0513.cd.zip [file fig9 - Realized disutility - iterative - c=0.9 sojourn_time=180.pdf › 2023.0513/results/figures/fig9 - Realized disutility - iterative - c=0.9 sojourn_time=180.pdf]

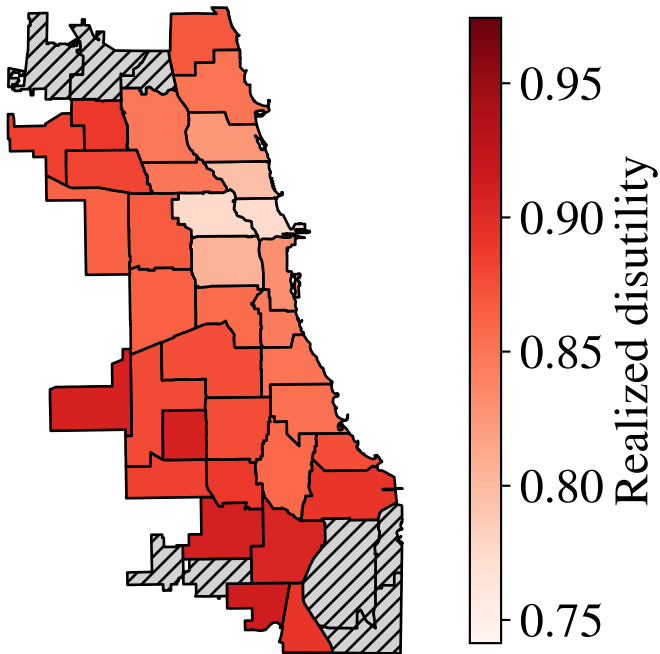

Supplement: opre.2023.0513.cd.zip [file fig9 - Realized disutility - match - c=0.9 sojourn_time=180.pdf › 2023.0513/results/figures/fig9 - Realized disutility - match - c=0.9 sojourn_time=180.pdf]

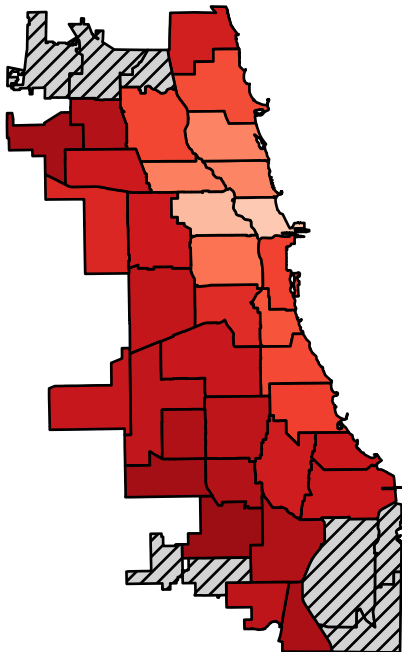

Supplement: opre.2023.0513.cd.zip [file fig9 - Realized disutility - static - c=0.9 sojourn_time=180.pdf › 2023.0513/results/figures/fig9 - Realized disutility - static - c=0.9 sojourn_time=180.pdf]
